# Supplementary material for: Application of click chemistry to the production of DNA microarrays
Source: Royal Society of Chemistry journal article supplement (doi:10.1039/c2lc21096g), 2012-01-01

## Application of “click” chemistry to the production of DNA microarrays

Barbara Uszczyńska<sup>1</sup>, Tomasz Ratajczak<sup>2</sup>, Emilia Frydrych<sup>3</sup>, Hieronim Maciejewski<sup>3,4</sup>, Marek Figlerowicz<sup>1,5</sup>, Wojciech T. Markiewicz<sup>2</sup>, Marcin K. Chmielewski<sup>2\*</sup>

1.Center of Excellence for Nucleic Acid-Based Technologies CENAT, Institute of Bioorganic Chemistry, Polish Academy of Sciences, Noskowskiego 12/14, 61-704 Poznań

2.Laboratory of Bioconjugate Chemistry, Institute of Bioorganic Chemistry, Polish Academy of Sciences, Noskowskiego 12/14, 61-704 Poznań

3.Poznań Science and Technology Park, A. Mickiewicz University Foundation, Rubież 46, 61-612 Poznań

4.Faculty of Chemistry, A. Mickiewicz University, Grunwaldzka 6, 60-780 Poznań

5.Institute of Computing Science, Poznan University of Technology, Piotrowo 3A, 60-965 Poznan, Poland

### Contents:

|     |                                                                                    |    |
|-----|------------------------------------------------------------------------------------|----|
| (1) | General remarks                                                                    | 1  |
| (2) | <sup>1</sup> H <sup>13</sup> C <sup>29</sup> Si NMR and FT-IR spectra for <b>1</b> | 2  |
| (3) | <sup>1</sup> H <sup>13</sup> C <sup>31</sup> P NMR spectra for <b>2</b>            | 7  |
| (4) | Image microarrays after printing                                                   | 11 |
| (5) | Image CPG from fluorescent microscope                                              | 12 |
| (6) | Analysis of oligonucleotides by capillary electrophoresis and MALDI-TOF analysis   | 13 |
| (7) | Calculated the level of loading of CPG with functional groups                      | 20 |
| (8) | Microscope image of the CPG particles with length bar                              | 21 |

#### (1) General remarks:

All reagents (analytical grade) were obtained from commercial suppliers and used without further purification. Anhydrous benzene, toluene and CH<sub>2</sub>Cl<sub>2</sub> were freshly distilled from P<sub>2</sub>O<sub>5</sub> and CaH<sub>2</sub>, respectively. All other anhydrous solvents and liquid reagents were dried through storage over activated 4Å (EtOH, Et<sub>3</sub>N, pyridine,) or 3Å (MeOH, MeCN) molecular sieves.

Progress of reaction was monitored by Thin Layer Chromatography and <sup>31</sup>P NMR spectra while purification was effected by column chromatography, using silica gel (60-120 mesh).

<sup>1</sup>H, <sup>13</sup>C, <sup>29</sup>Si NMR. The NMR spectra were recorded at 298 K on a Bruker Advance DRX 400 spectrometer operating at frequencies 400.13201 MHz (<sup>1</sup>H), 100.62281 MHz (<sup>13</sup>C) and 79.45750 MHz (<sup>29</sup>Si). <sup>31</sup>P NMR spectra were recorded at on Varian Unity 300 spectrometer operating at frequencies 121 MHz; 5% H<sub>3</sub>PO<sub>4</sub> in D<sub>2</sub>O as an external

In all spectra for **1** CDCl<sub>3</sub> was used and for **2** DMSO was used as the solvent.

FT-IR spectra were recorded on a Bruker Tensor 27 Fourier transform spectrometer equipped with a SPECAC Golden Gate diamond ATR unit. In all cases, 16 scans at a resolution of 2 cm<sup>-1</sup> at RT were collected for the spectrum.

Mass spectra of analyzed compound **1** was collected on Varian 4000 GC/MS chromatographic system equipped with Varian VF Factor-Four – 5ms, 30 m long capillary column, split/splitless type injection chamber, MS (ion trap) detector and autosampler. Mass spectra was recorded in a range 50 to 1000 m/z and electron impact (EI) ionization technique was used.

# <sup>1</sup>H NMR of compound 1

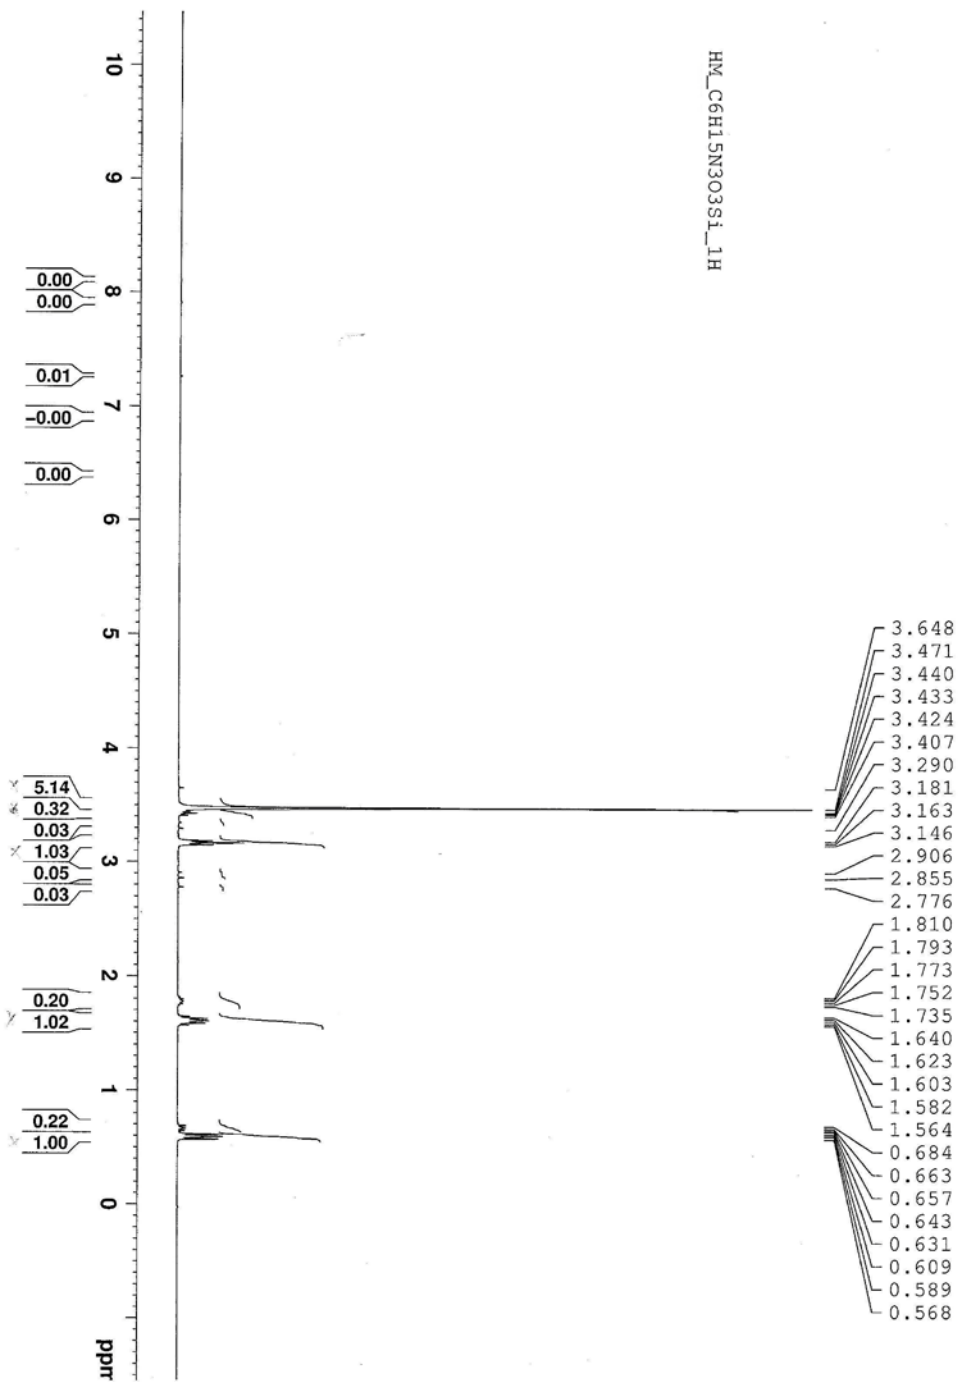

Fig  $^{13}\text{C}$  NMR of compound 1

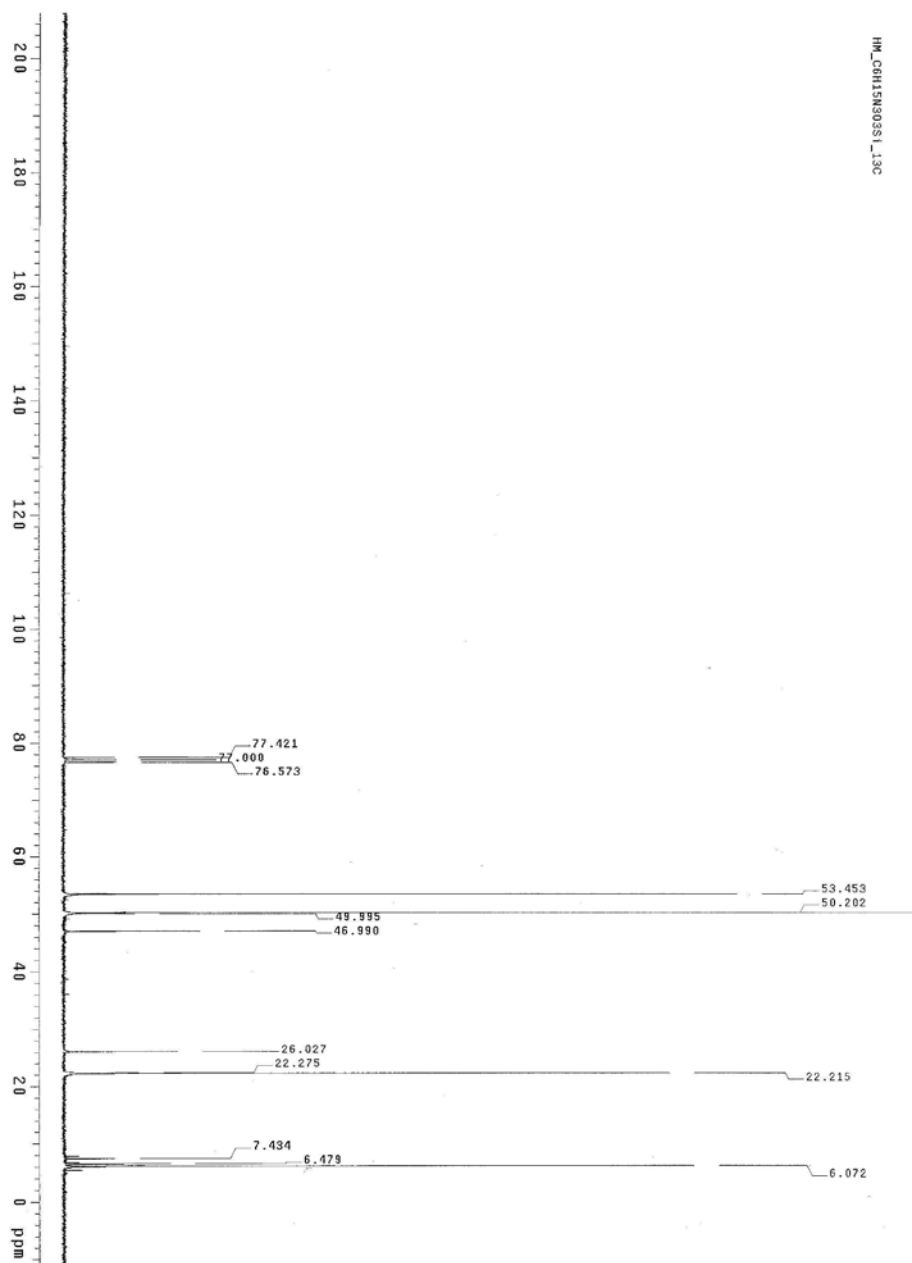

Fig  $^{29}\text{Si}$  NMR of compound **1**

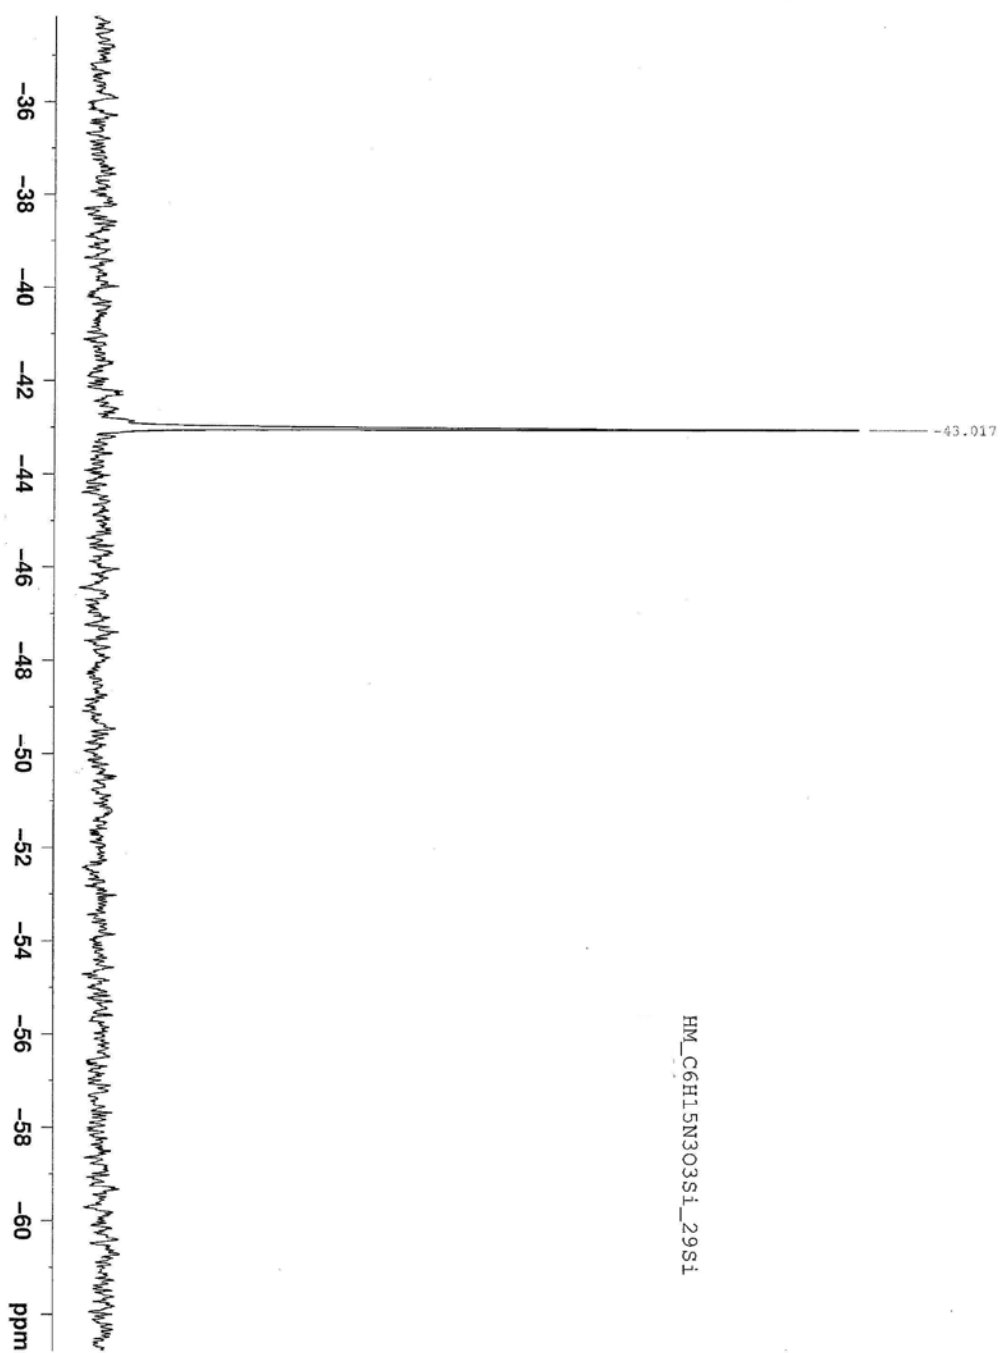

Fig FT-IR of compound 1

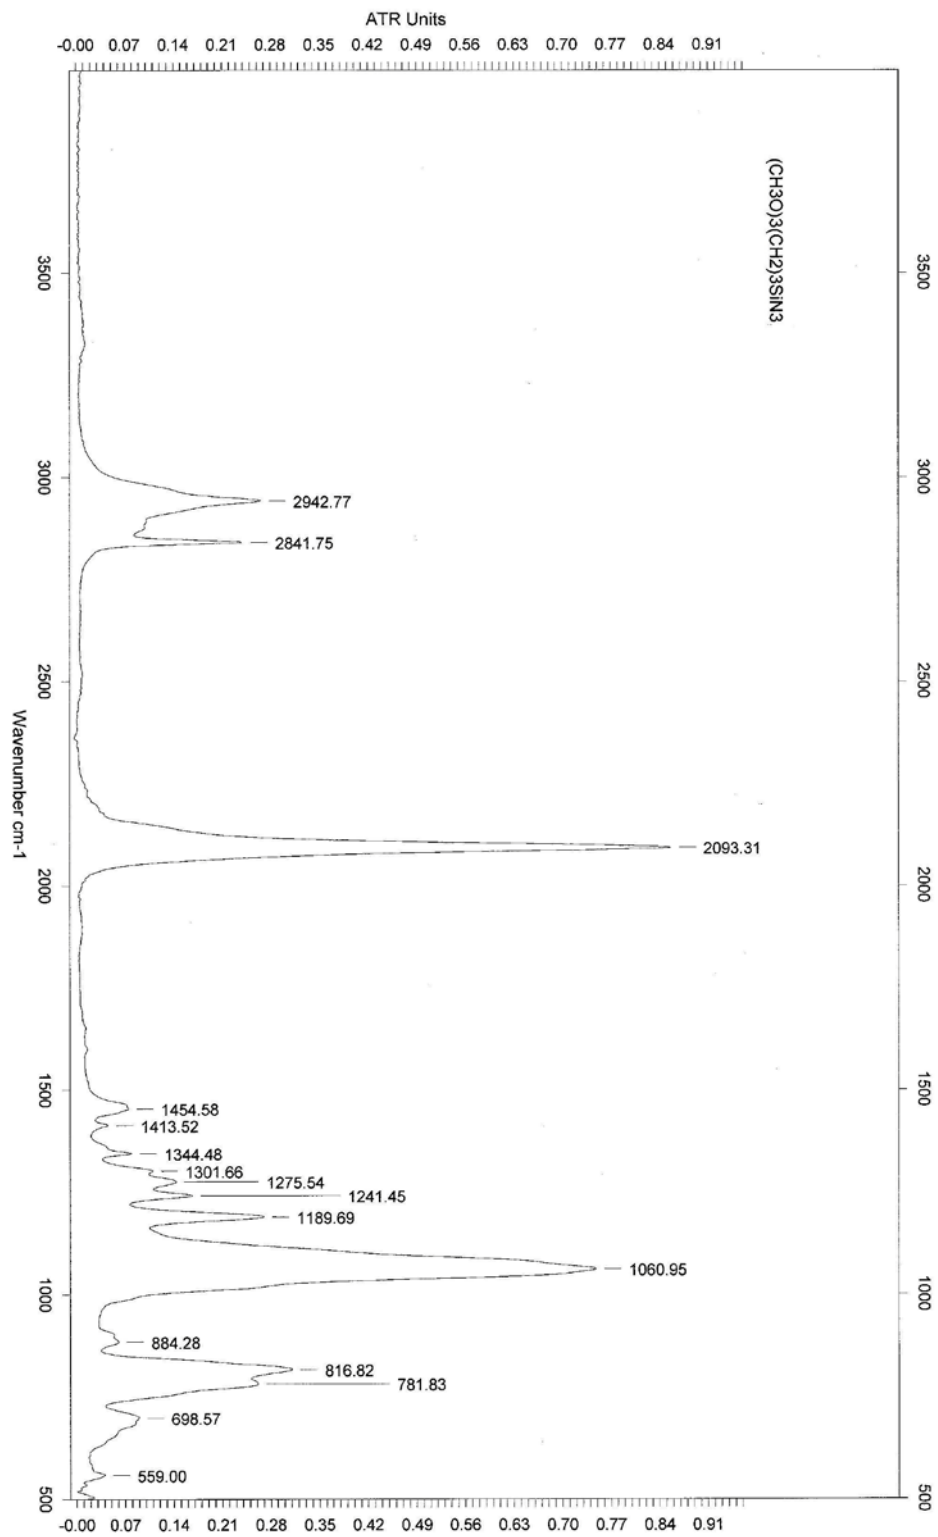

Fig GC-MS of compound 1

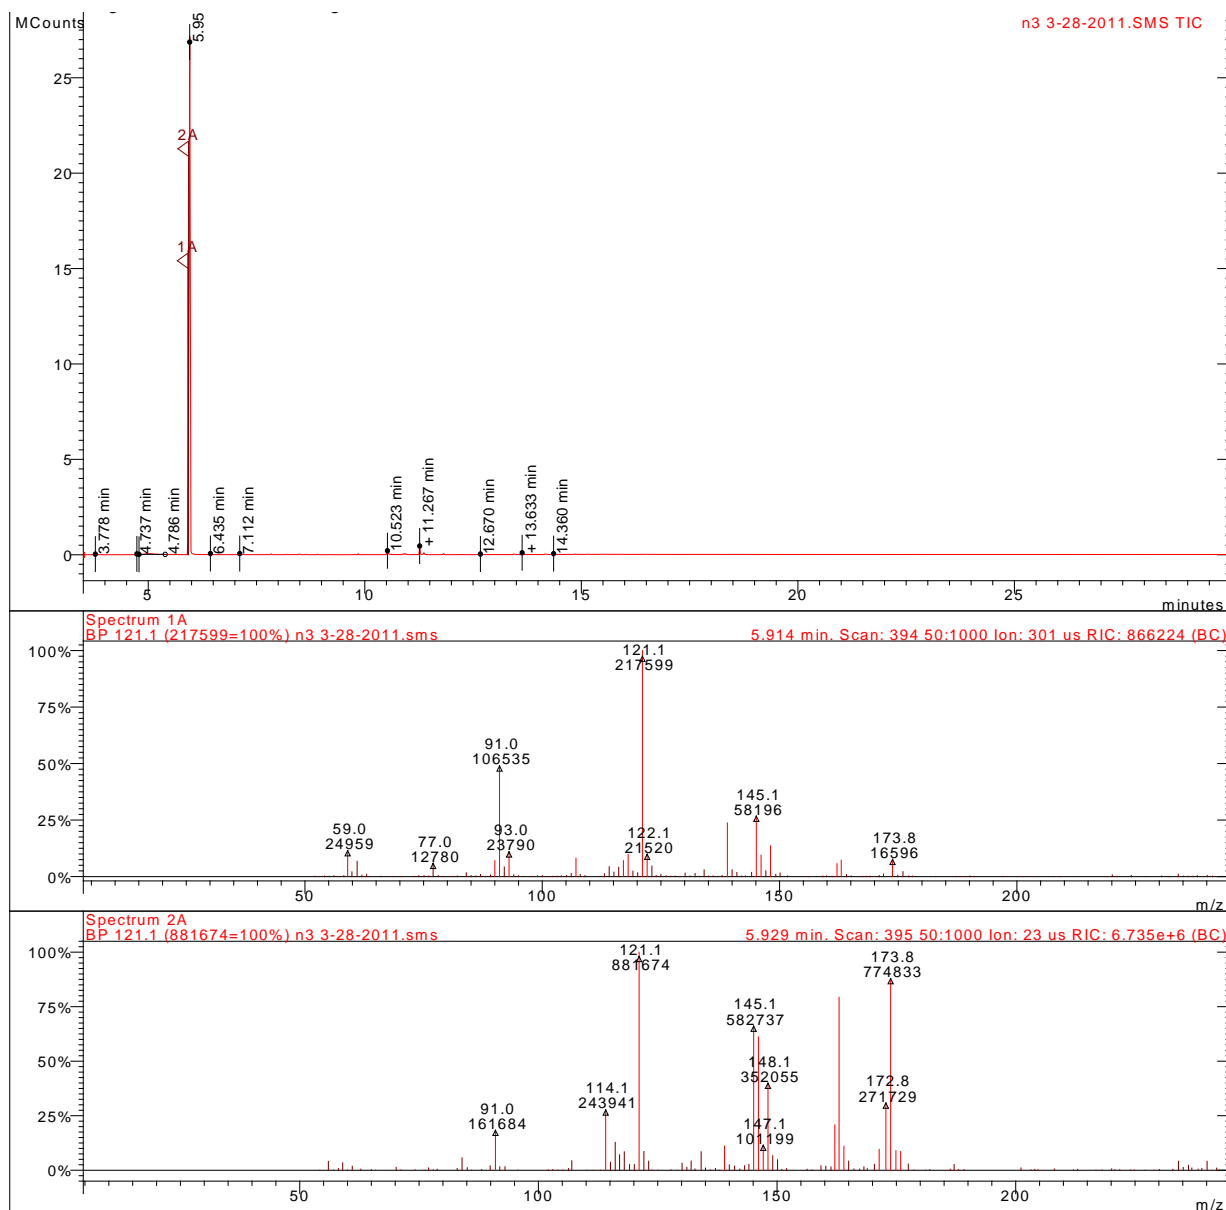

Fig  $^1\text{H}$  NMR of compound 2





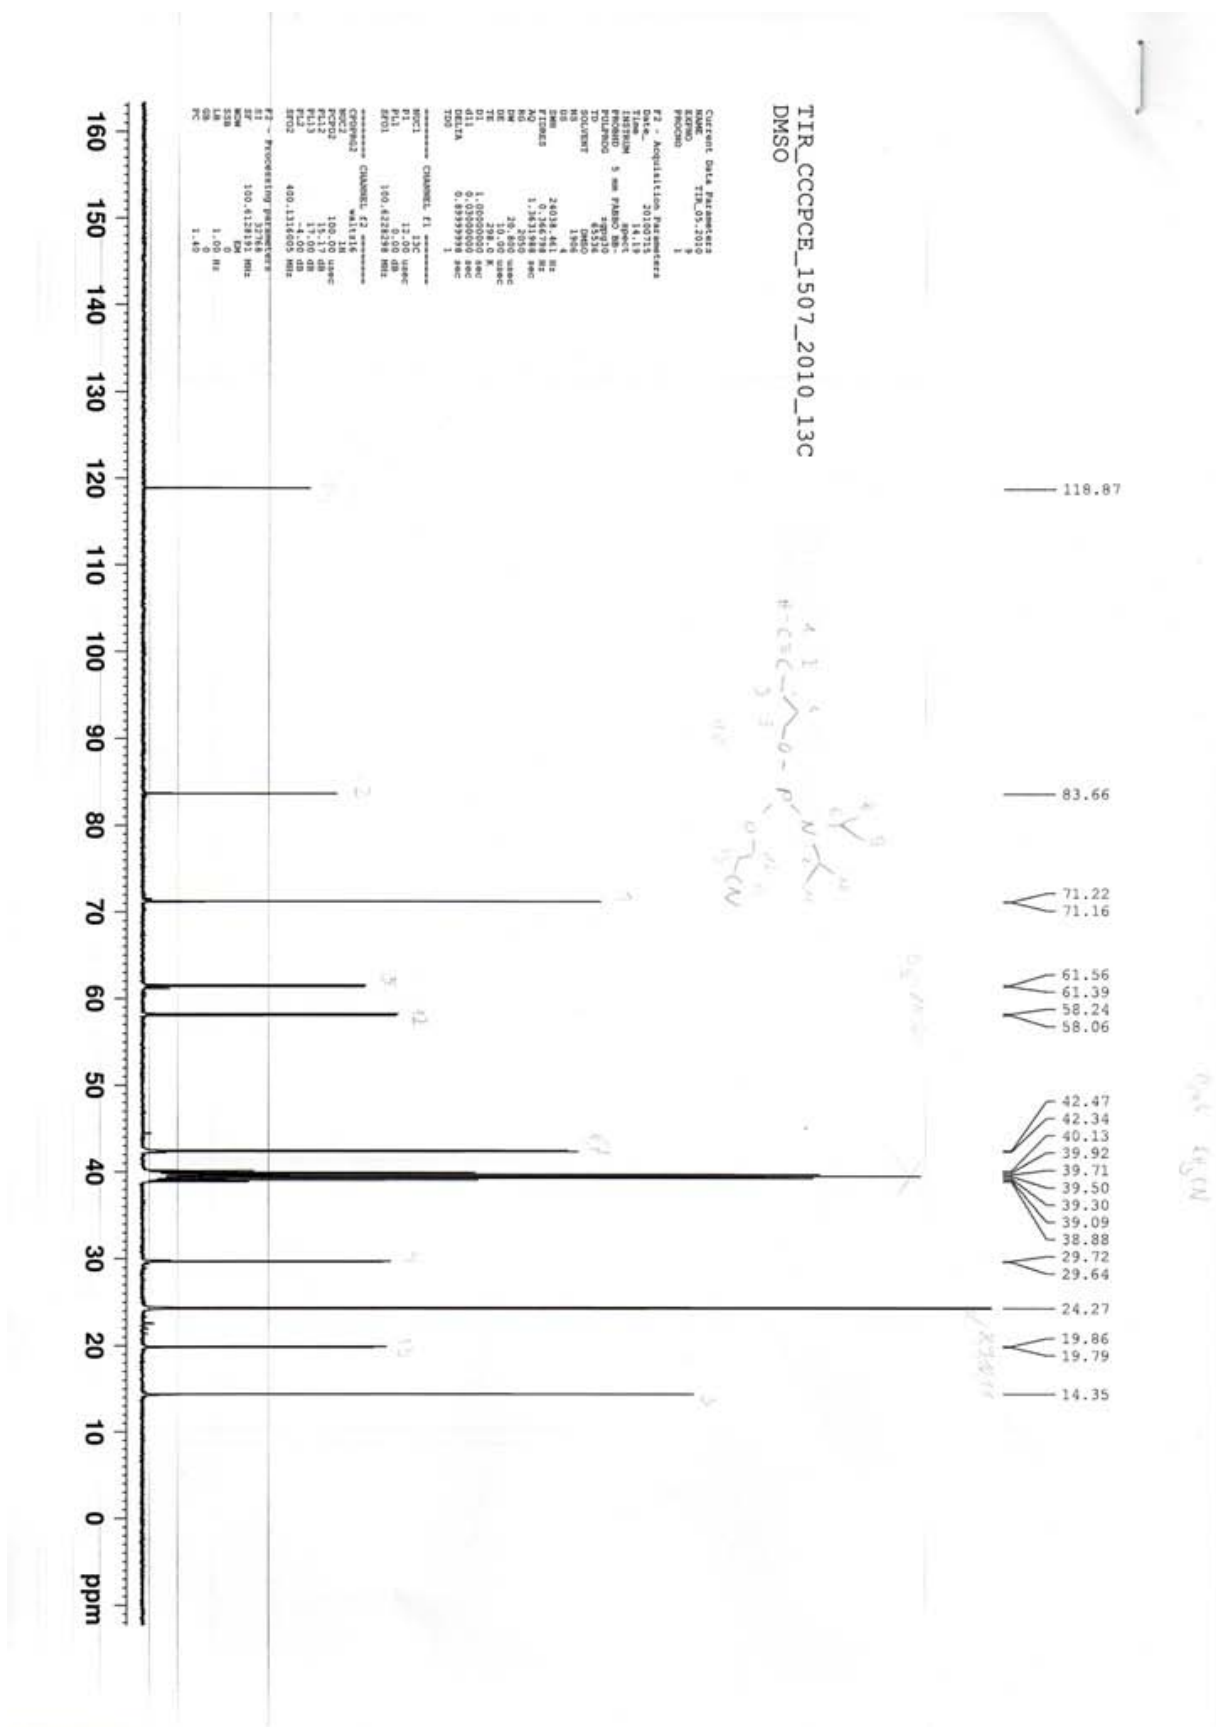

Fig uncoupled <sup>31</sup>P NMR a of compound 2

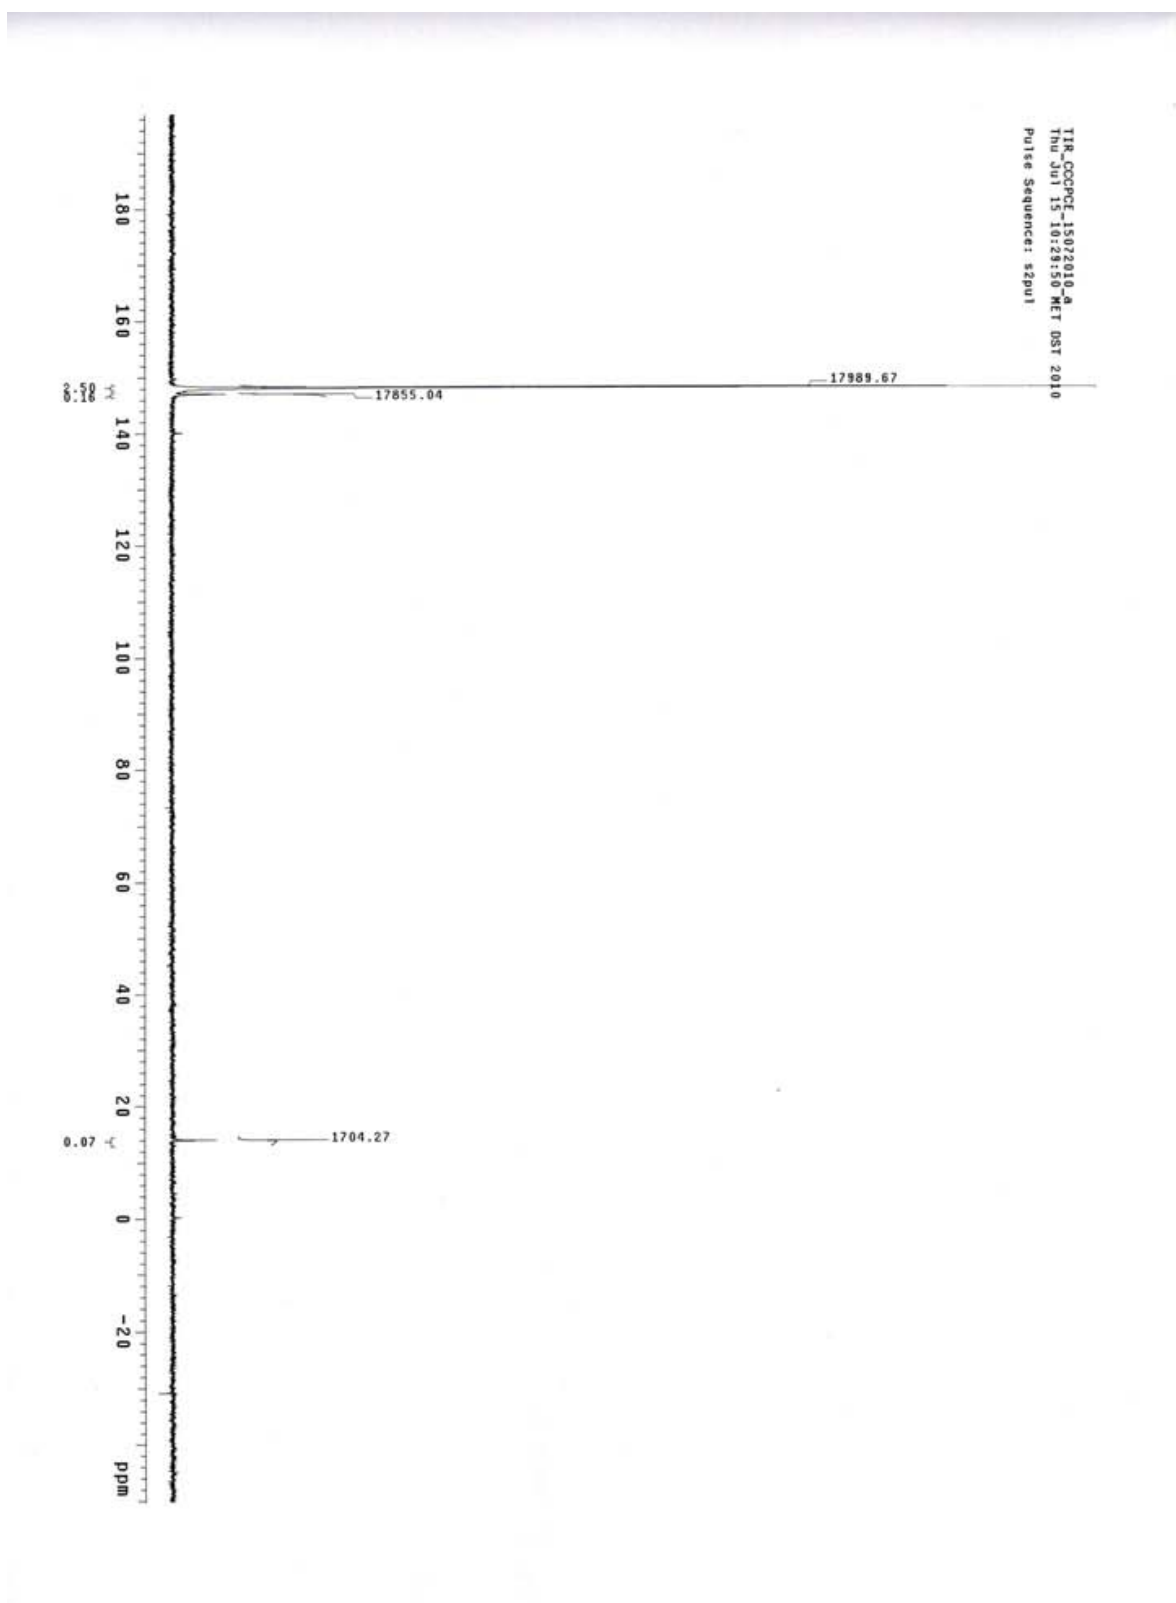

Fig  $^{31}\text{P}$  NMR couple with hydrogen of compound 2

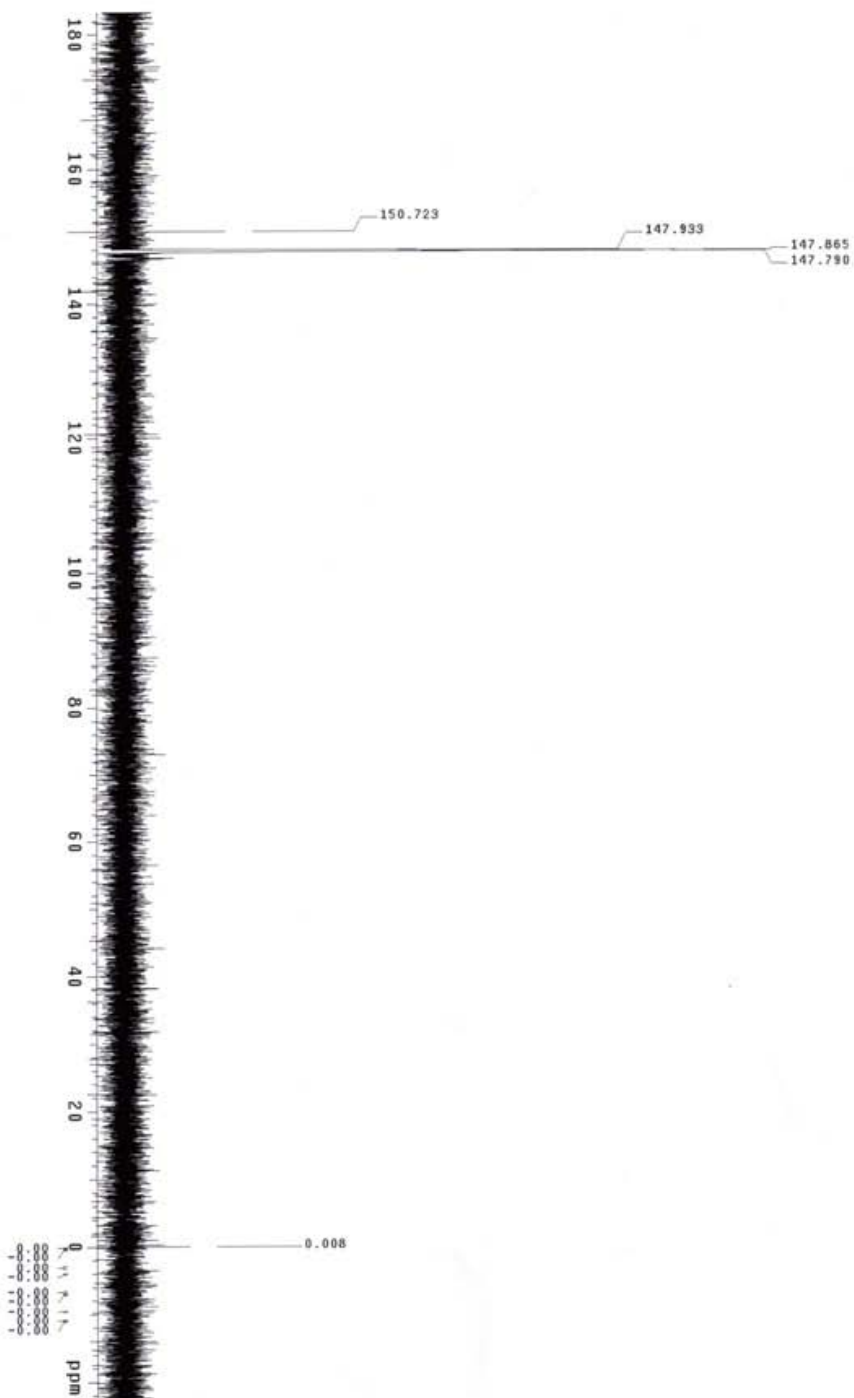

Image microarrays after printing

Fig 0.5% concentration of azidofunctional silane

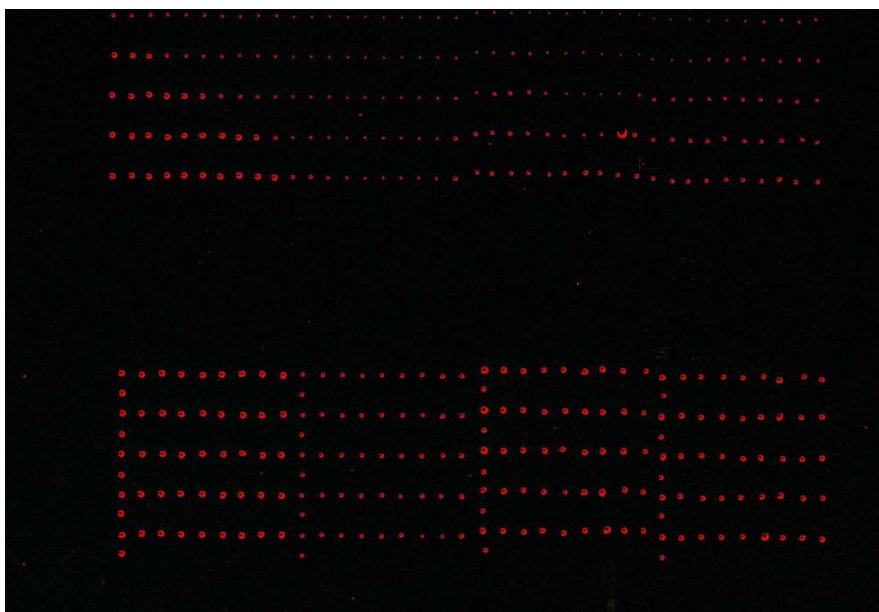

Fig 0.2% concentration of azidofunctional silane

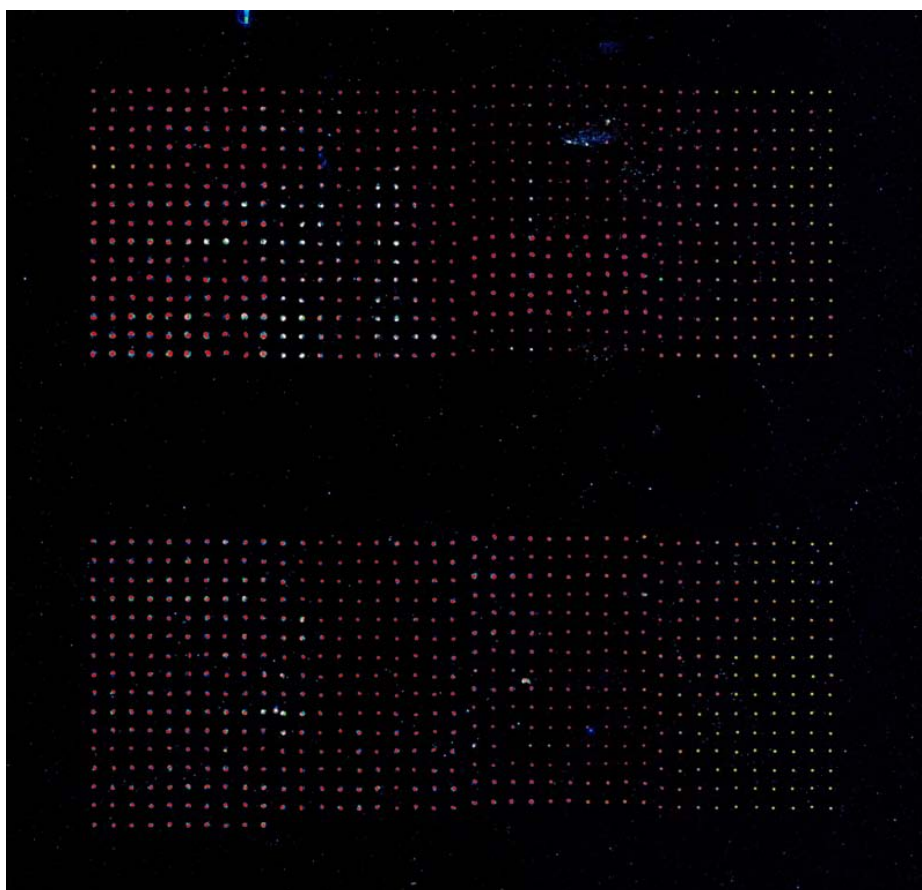

**Image CPG from fluorescent microscope**

Fig . Effect of treatment azide-functionalized CPG with ODN-3 and labeled oligomer MIX-F  
The green fluorescence was visualized by fluorescent microscope

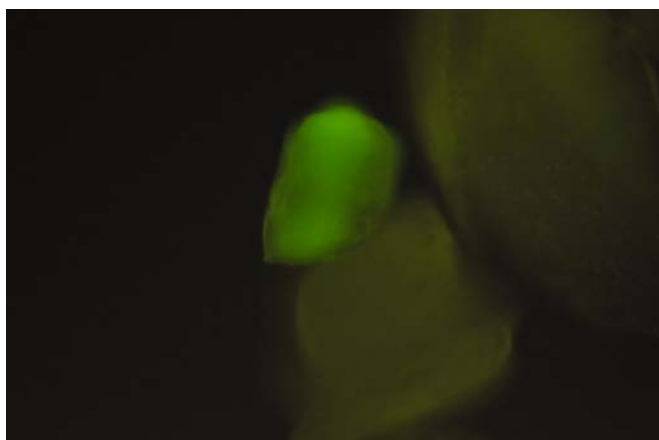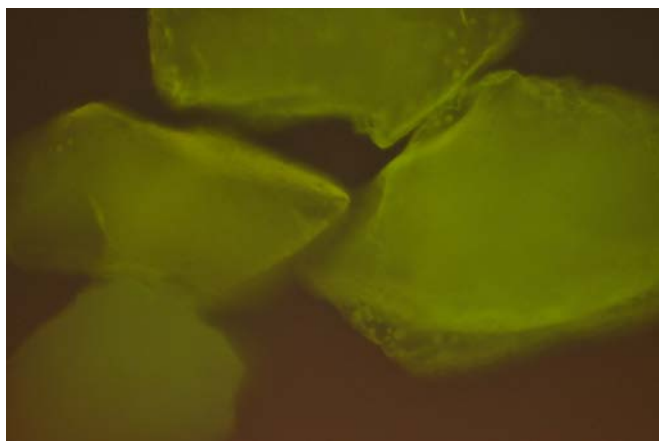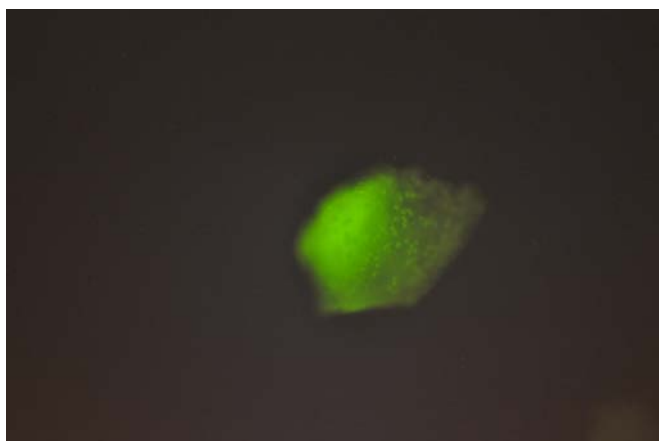

## Analysis of oligonucleotides by capillary electrophoresis and MALDI-TOF analysis

ODN-1

capillary electrophoresis

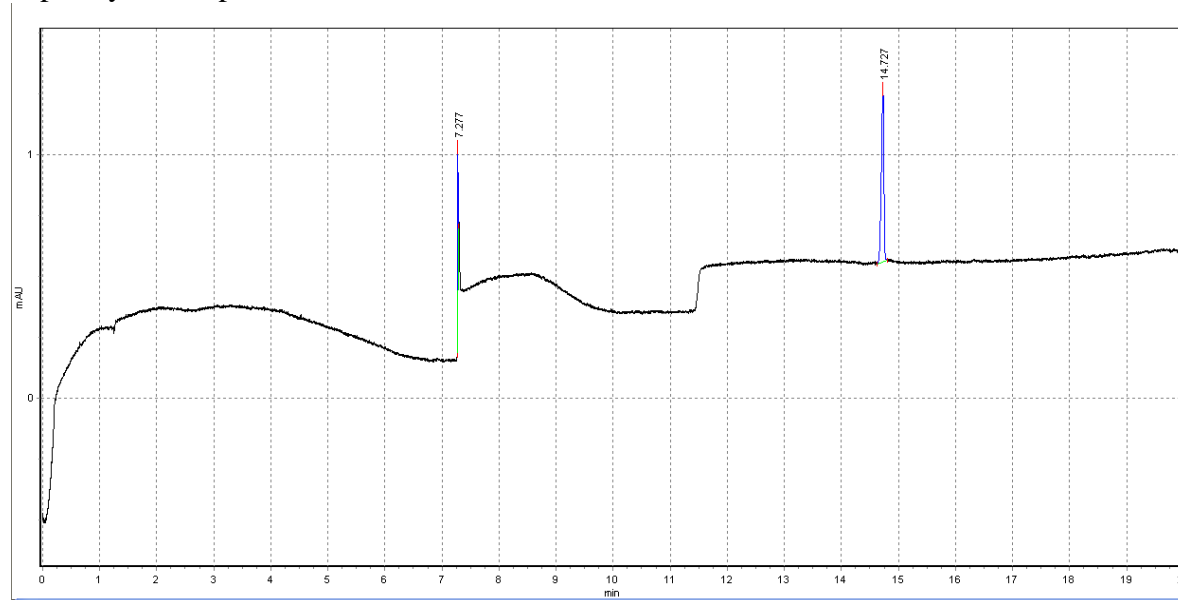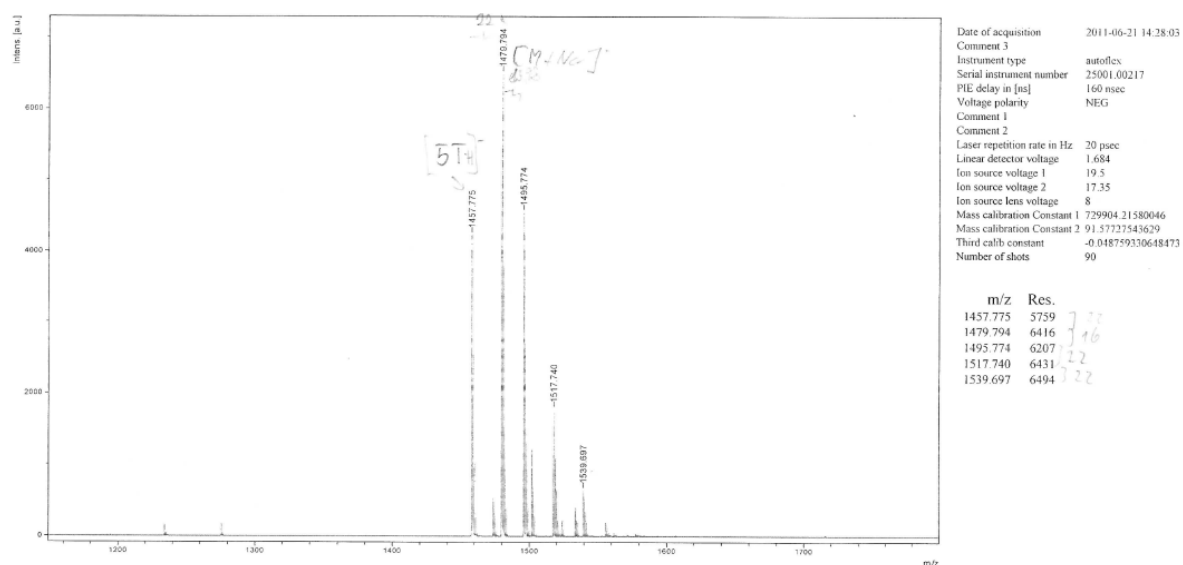

MS MALDI calculated mass 6661,467; found m/z M- 1457,775 m/z; 1479,794 [M+Na] m/z; 1495,774 m/z [M+K]

ODN-2

capillary electrophoresis

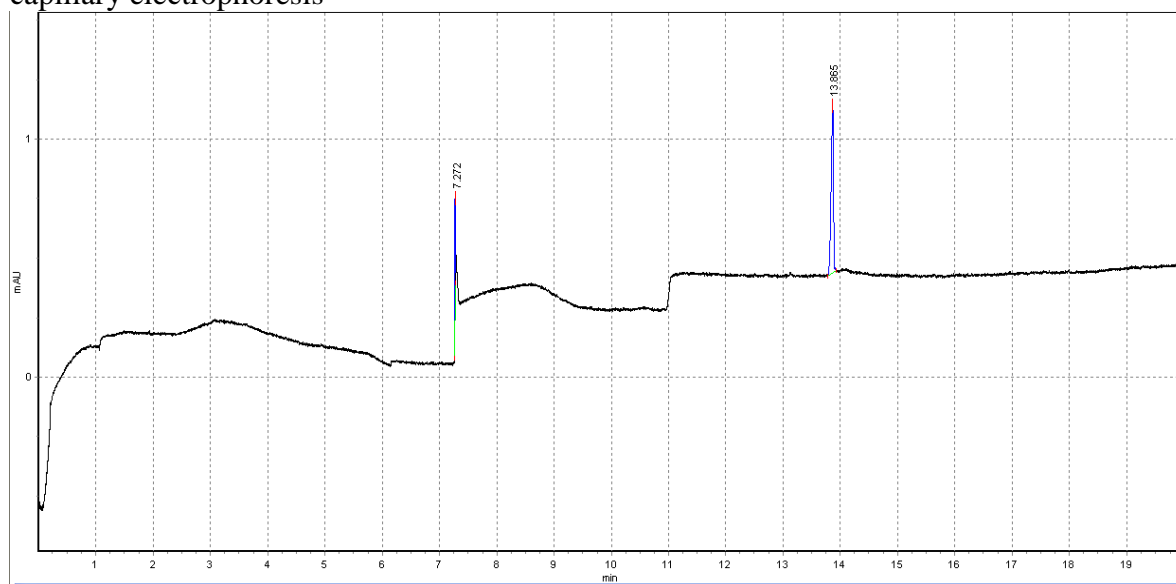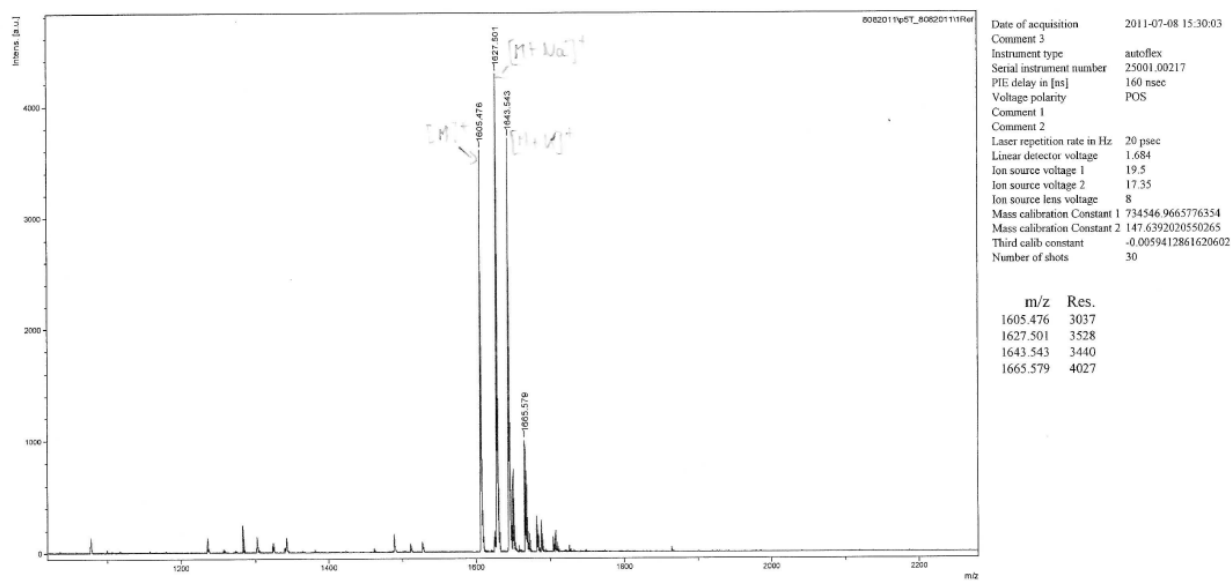

MS MALDI calculated mass 1605; found m/z 1605,476 m/z; 1627,501 m/z [M+Na]<sup>+</sup>;  
1643,543 m/z [M+K]<sup>+</sup>

ODN-3

capillary electrophoresis

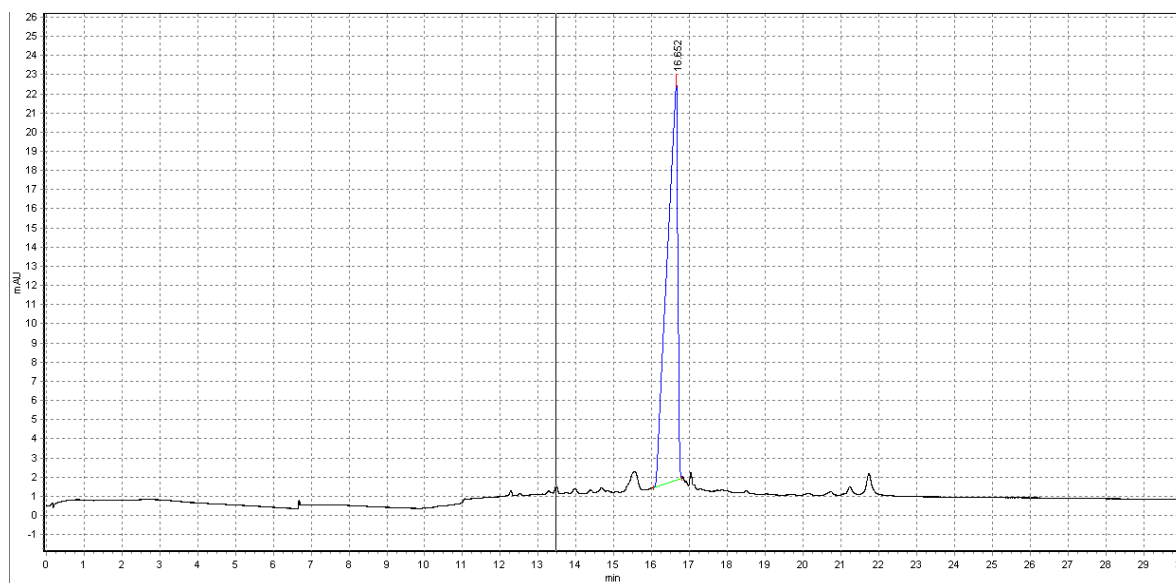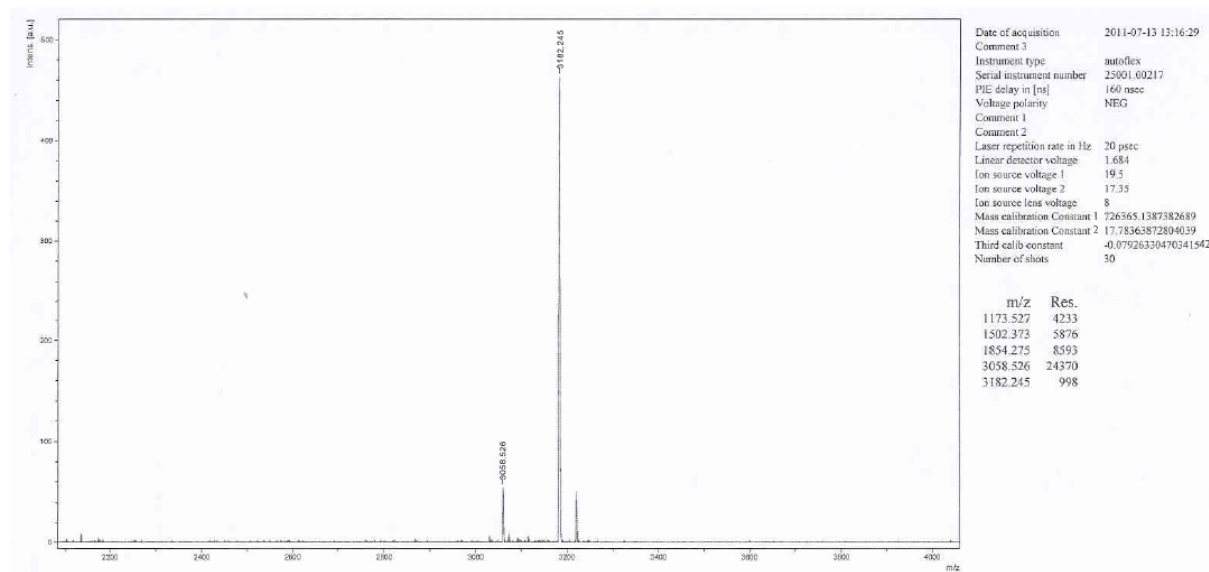

MS MALDI calculated mass 3182,2; found m/z 3182,081 m/z;



## ODN-4

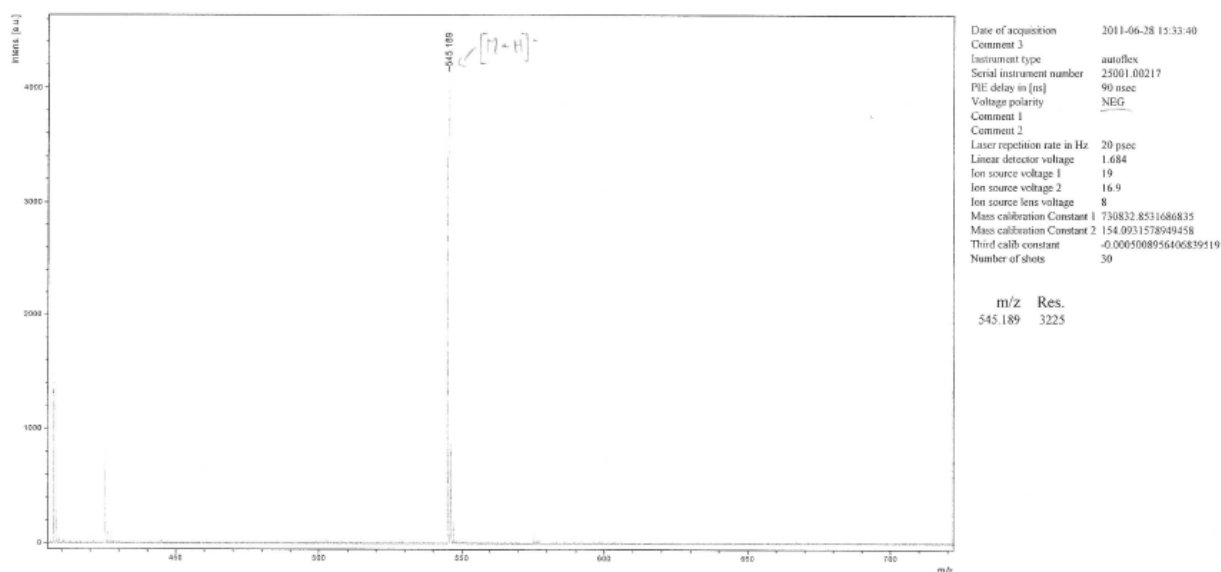

MS MALDI calculated mass 545.4; found m/z 545,189 m/z;

## ODN-5

capillary electrophoresis

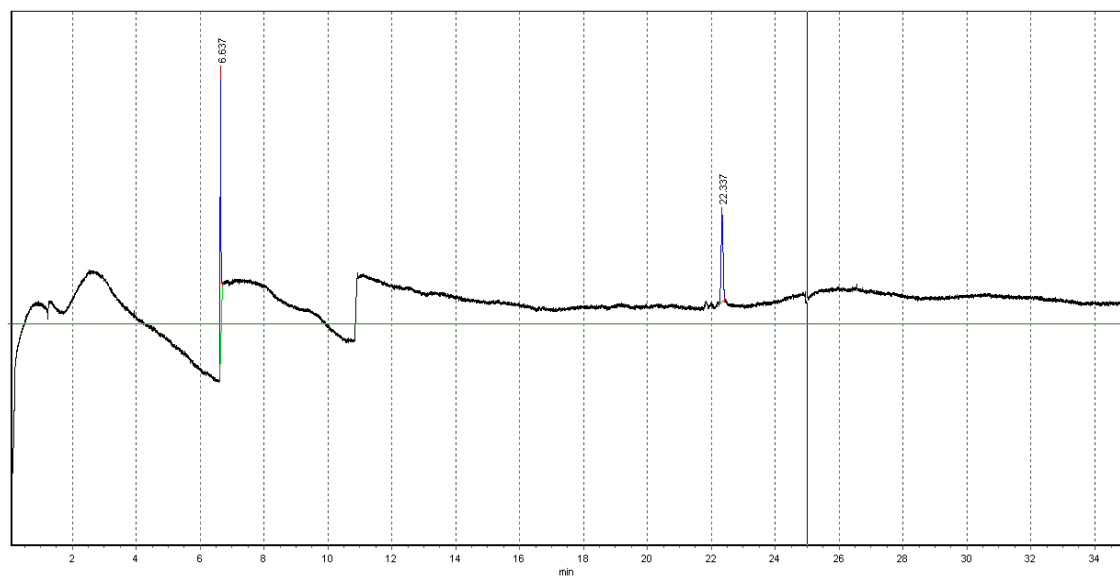

MALDI-TOF MS

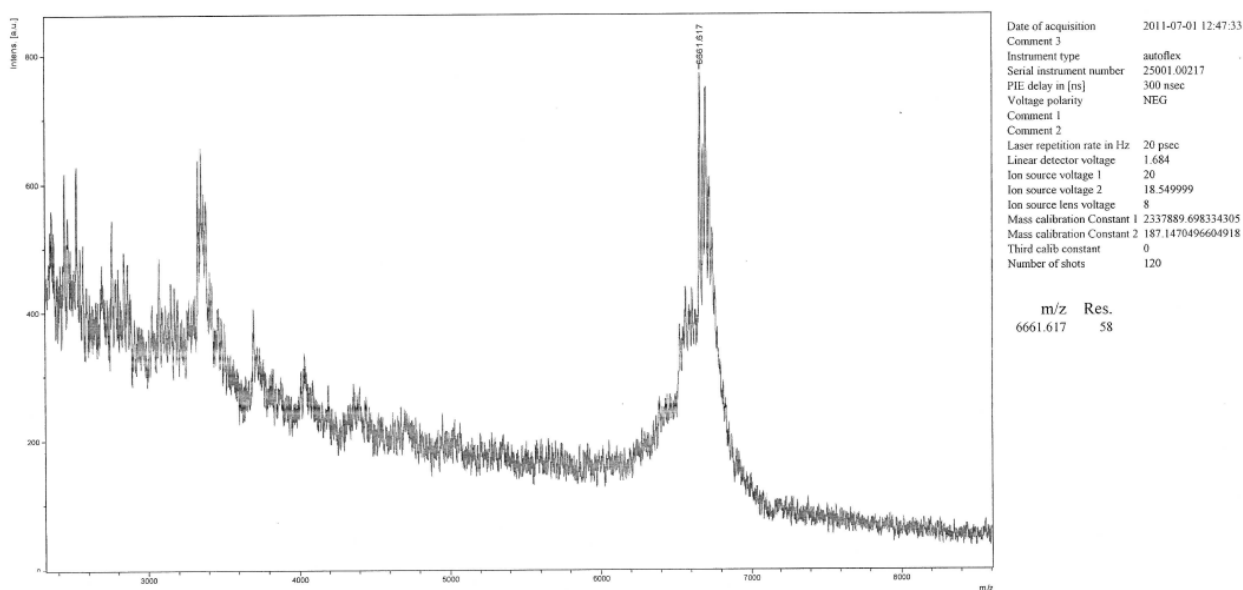

MS MALDI calculated mass 6661,467; found m/z 6661,6172 m/z

### ODN-6

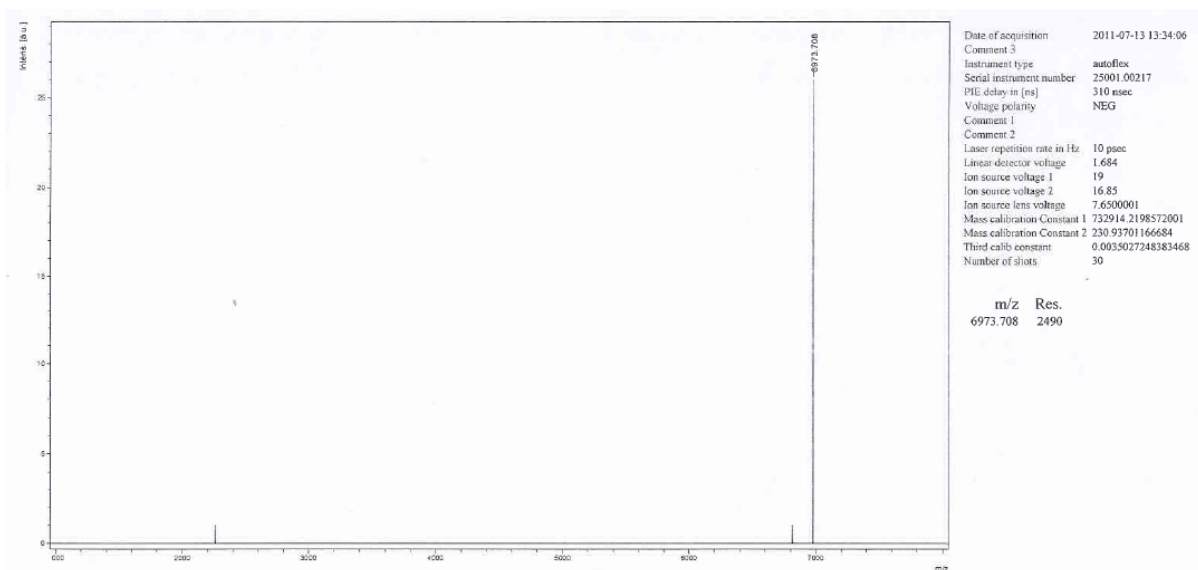

MS MALDI calculated mass 6972.959; found m/z 6973.708 m/z;

### ODN-7

capillary electrophoresis

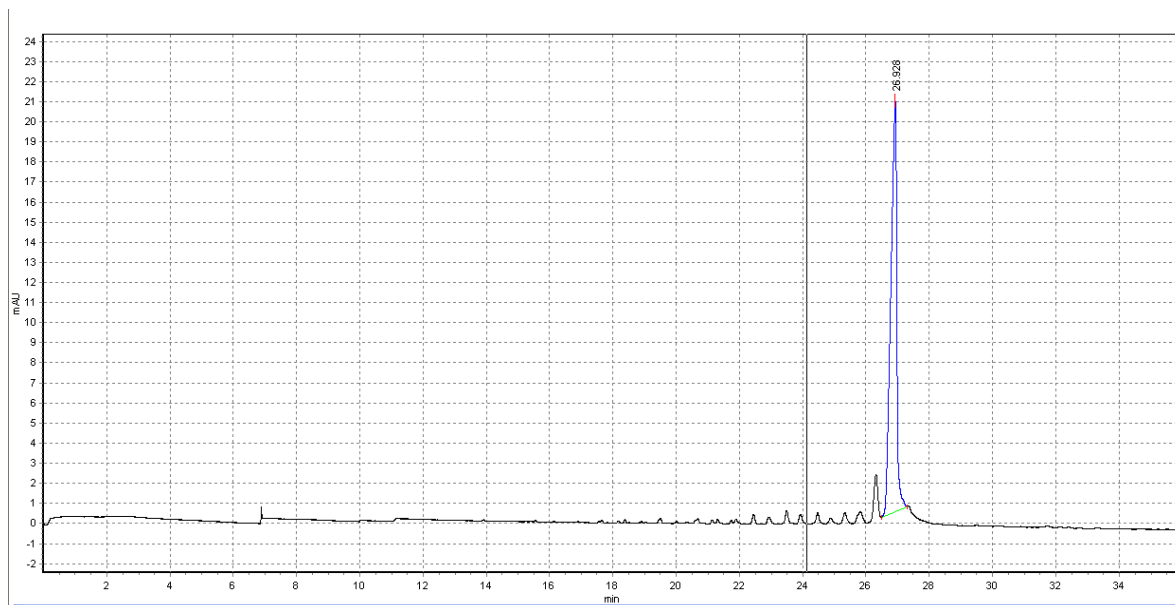

### MALDI-TOF MS

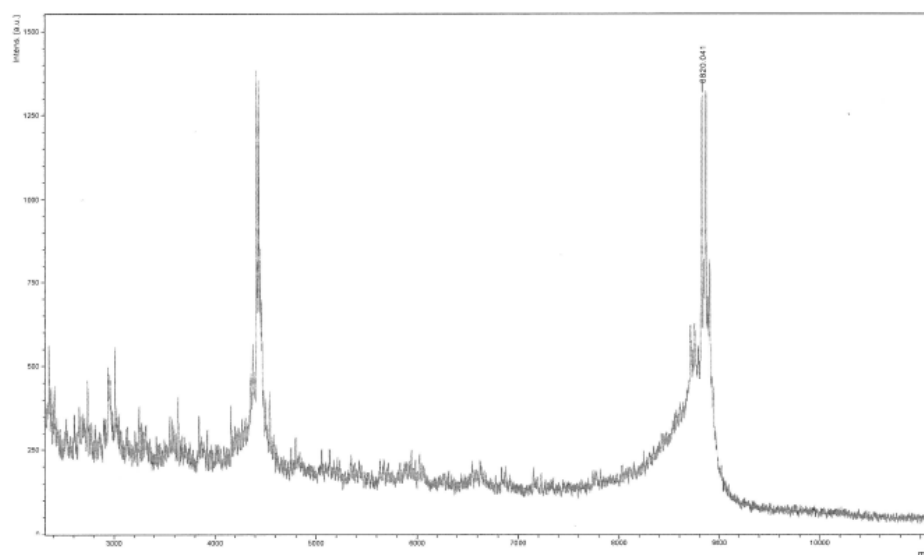

Date of acquisition 2011-07-01 12:48:13  
Comment 3  
Instrument type autoflex  
Serial instrument number 25001.00217  
PIE delay in [ns] 300 nsec  
Voltage polarity NEG  
Comment 1  
Comment 2  
Laser repetition rate in Hz 20 psec  
Linear detector voltage 1.684  
Ion source voltage 1 20  
Ion source voltage 2 18.549999  
Ion source lens voltage 8  
Mass calibration Constant 1 2337889.698334305  
Mass calibration Constant 2 187.1470496604918  
Third calib constant 0  
Number of shots 80

| m/z      | Res. |
|----------|------|
| 8820.041 | 491  |

MS MALDI calculated mass 8820,717; found m/z 8820,041 m/z

OND – 8

capillary electrophoresis

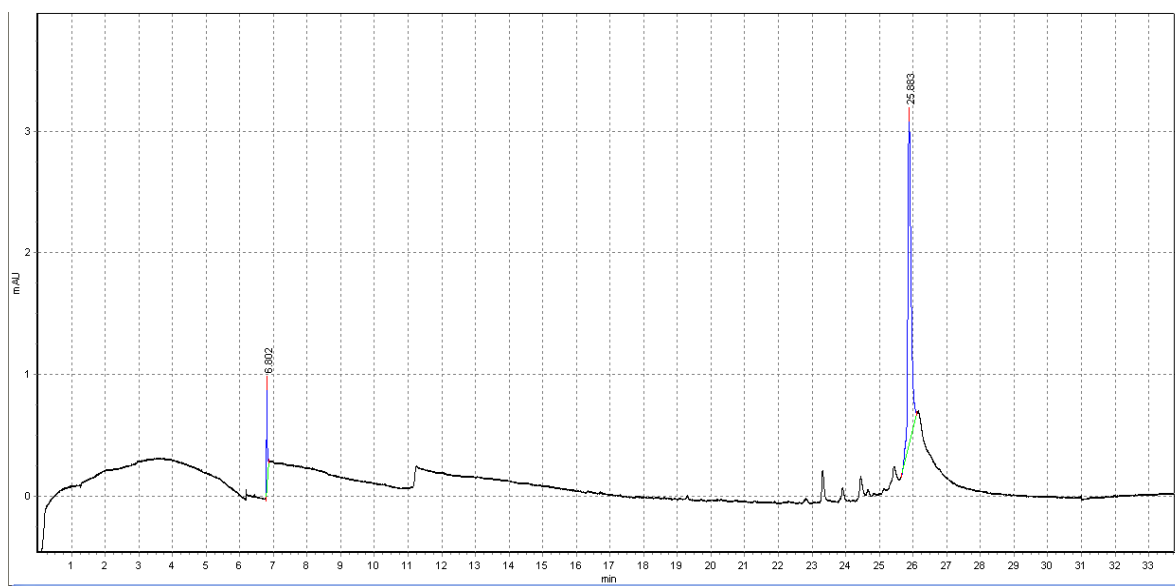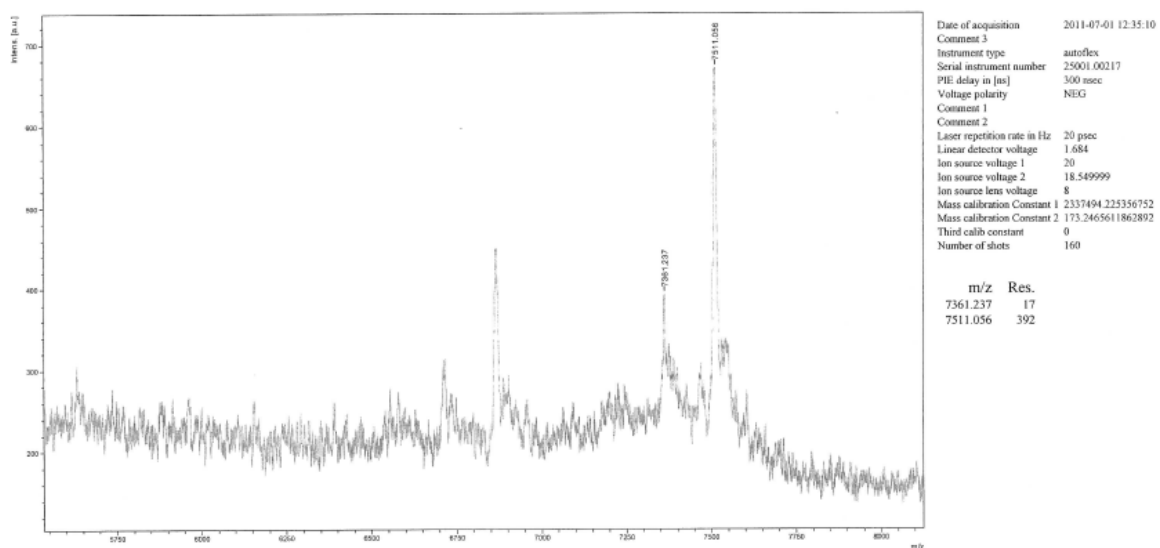

MS MALDI calculated mass 7511,3; found  $m/z$  7511,056  $m/z$ ;

## Calculated the level of loading of CPG with functional groups

**Table 1.** The rate of loading calculated on the basis of UV measurements at 504 nm wavelength.

| Support                    | Mass [mg] | 1 attach | 2 attach | Absolute loading [ $\mu\text{mol/g}$ ] | Background-corrected loading [ $\mu\text{mol/g}$ ] |
|----------------------------|-----------|----------|----------|----------------------------------------|----------------------------------------------------|
| 1                          | 6.00      | 1.36     | 1.24     | 32.48                                  | 27.21                                              |
| 2                          | 7.84      | 1.73     | 1.57     | 31.45                                  | 27.42                                              |
| 3                          | 7.22      | 1.63     | 1.43     | 32.33                                  | 27.96                                              |
| blank                      | 7.58      | 0.22     | 0.25     | 4.16                                   | -                                                  |
| Average loading of support |           |          |          | 31.96                                  | 27.31                                              |

**Table 2.** The rate of loading calculated on the basis of UV measurements.

| Probe | Mass [mg] | Reaction time [h] | Absorbance | Loading of support [ $\mu\text{mol/g}$ ] |
|-------|-----------|-------------------|------------|------------------------------------------|
| I     | 2.45      | 1                 | 0.546      | 31.837                                   |
| II    | 3.49      | 2                 | 0.753      | 30.823                                   |
| III   | 5.93      | 12                | 1.247      | 30.041                                   |

Microscope image of the CPG particles with length bar

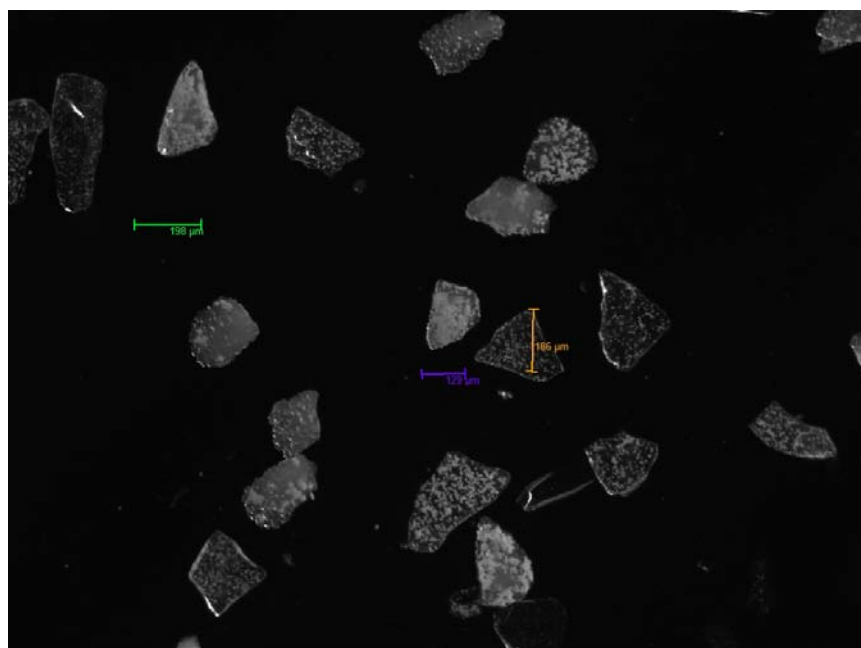

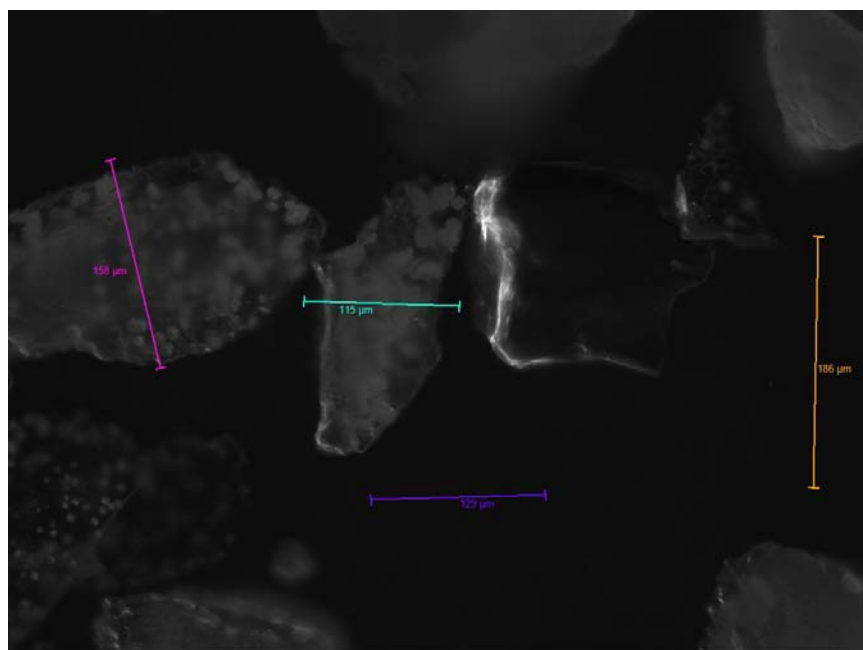

Supplement: c2lc21096g.pdf [file c2lc21096g.pdf]
